# Supplementary material for: Metabolite Profiling and Anti-Aging Activity of Rice Koji Fermented with Aspergillus oryzae and Aspergillus cristatus: A Comparative Study
Source: MDPI journal article supplement (doi:10.3390/metabo11080524), 2021-08-08
Supplement: s1 [file s1]

# Supplementary data

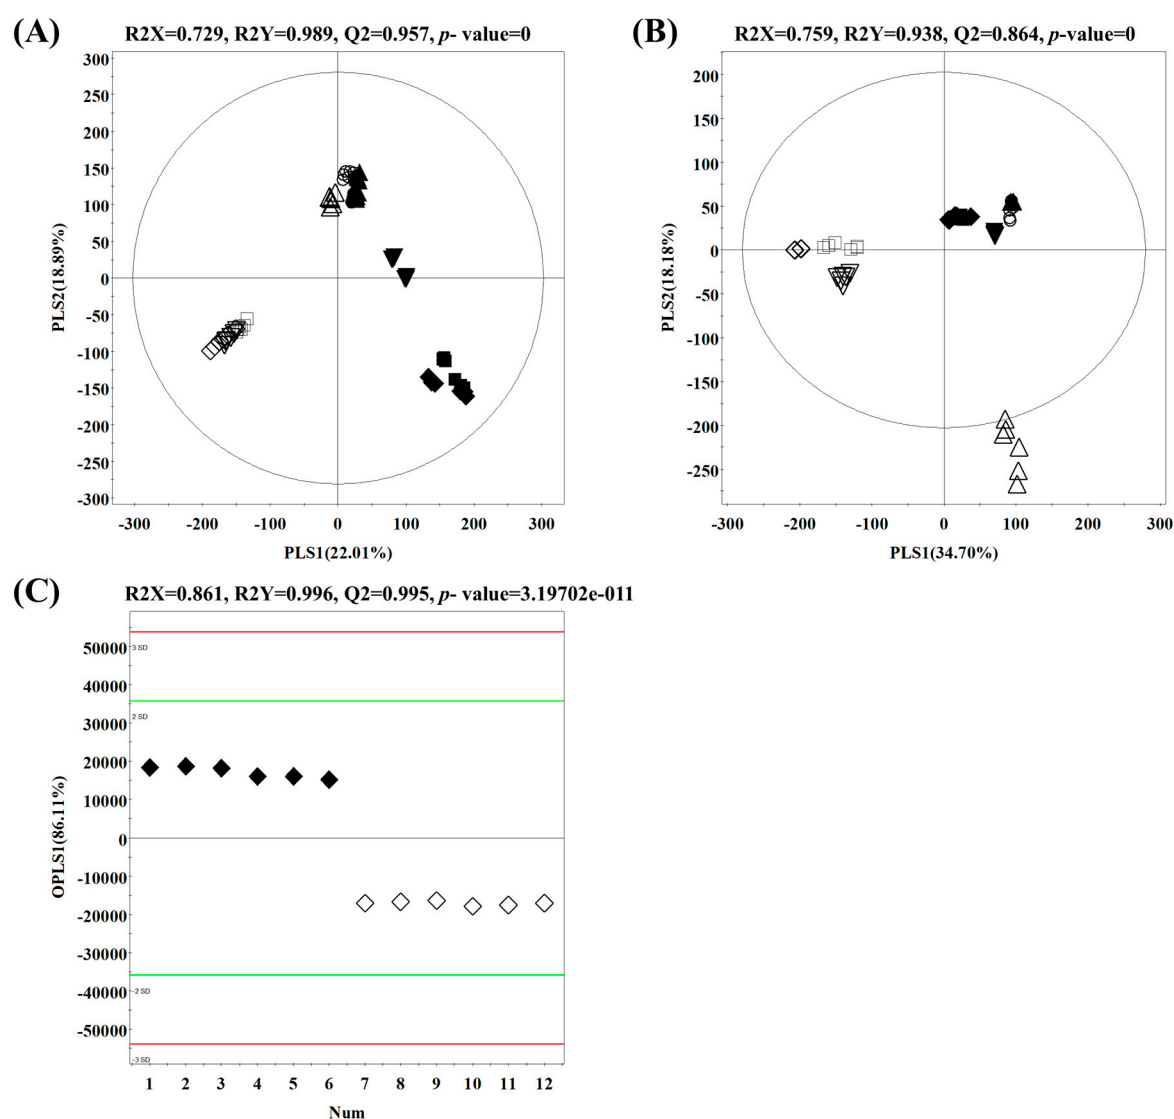

**Figure S1.** The PLS-DA score plot (A, B) and OPLS-DA score plot (C) for rice koji fermented with *Aspergillus cristatus* or *A. oryzae* were obtained from UHPLC-LTQ-Orbitrap-MS/MS (A, C) and GC-TOF-MS (B). (filled symbols, *A. cristatus*; unfilled symbols, *A. oryzae*; ●, ○, 0 day; ▲, △, 2 day; ▼, ▽, 4 day; ■, □, 6 day; ◆, ◇, 8 day)

**Table S1.** List of significantly distinct metabolites from rice *koji* with different *Aspergillus* spp. during fermentation identified by UHPLC-LTQ-Orbitrap-MS/MS.

| No.                           | Metabolite             | RT <sup>a</sup> | <i>m/z</i>         |                       | M.W. <sup>b</sup> | Molecular Formula | $\Delta$<br>ppm | MS <sup>c</sup> fragment pattern ( <i>m/z</i> ) | $\lambda_{\max}$ | I.D. <sup>d</sup>    |
|-------------------------------|------------------------|-----------------|--------------------|-----------------------|-------------------|-------------------|-----------------|-------------------------------------------------|------------------|----------------------|
|                               |                        |                 | [M-H] <sup>-</sup> | [M+H] <sup>+</sup>    |                   |                   |                 |                                                 |                  |                      |
| <i>Carboxylic acids</i>       |                        |                 |                    |                       |                   |                   |                 |                                                 |                  |                      |
| 1                             | Malic acid             | 0.74            | 133.0152           | 157.0492              | 134               | C4H6O5            | 6.491           | (-)133>115>70                                   | -                | REF <sup>e</sup> [1] |
| 2                             | Succinic acid          | 0.95            | 117.0202           | 119.0895              | 118               | C4H6O4            | 7.162           | (-)117>99,73                                    | -                | REF[2]               |
| <i>Phenolic acid</i>          |                        |                 |                    |                       |                   |                   |                 |                                                 |                  |                      |
| 3                             | Dihydroxybenzoic acid  | 3.92            | 153.0201           | 177.0541 <sup>f</sup> | 154               | C7H6O4            | 5.019           | (-)153>109>81,65                                | 257              | REF[3]               |
| 4                             | Benzoic acid           | 4.04            | 121.0305           | 123.0440              | 122               | C7H6O2            | 7.992           | (-)121>101,97,89,78,77                          | -                | REF[4]               |
| 5                             | Vanillic acid          | 4.75            | 167.0360           | 169.0495              | 168               | C8H8O4            | 6.274           | (-)167>148,123>108,95,79                        | 256              | REF[3]               |
| 6                             | 4-Caffeoylquinic acid  | 4.96            | 353.0878           | 355.1024              | 354               | C16H18O9          | -0.015          | (-)353>283,223,191,179>135>108,91               | 257              | REF[5,6]             |
| 7                             | Diferulic acid         | 5.59            | 385.0943           | 387.1076              | 386               | C20H18O8          | 3.660           | (-)385>367,341>326,297,257>282                  | 220, 279         | REF[7,8]             |
| <i>Flavonoids</i>             |                        |                 |                    |                       |                   |                   |                 |                                                 |                  |                      |
| 8                             | Schaftoside            | 4.34            | 563.1415           | 565.1556              | 564               | C26H28O14         | 1.512           | (-)563>545, 473,443,413,383>353>325,297         | 215              | REF[9]               |
| 9                             | Isoscoparin            | 4.34            | 461.1112           | 463.1238              | 462               | C22H22O11         | 4.935           | (-)461>417,341,>297,231>255,224                 | 257              | REF[10]              |
| 10                            | Baicalin               | 5.24            | 445.0796           | 447.0920              | 446               | C21H18O11         | 4.394           | (-)445>311,282, 269 >240,224>209,197,181,152    | 268              | REF[11]              |
| 11                            | Isovitexin             | 5.53            | 431.0994           | 433.1130              | 432               | C21H20O10         | 2.459           | (-)431>413,388,341,327,309,283>281>253,238      | 220, 279         | REF[12]              |
| 12                            | Chrysoeriol            | 5.76            | 299.0580           | 301.0709              | 300               | C16H12O6          | 6.249           | (-)299>283,256>239,226,213>198,183,170,155      | 223, 284         | REF[12]              |
| 13                            | 3,8-Dimethylherbacetin | 6.43            | 329.0682           | 331.0810              | 330               | C17H14O7          | 4.662           | (-)329>314>299>271,227                          | 219[8], 319      | REF[13]              |
| 14                            | Calycosin              | 7.32            | 283.0627           | 285.0755              | 284               | C16H12O5          | 5.240           | (-)283>268,240>212>184                          | 218, 257         | REF[14]              |
| <i>Long-chain fatty acids</i> |                        |                 |                    |                       |                   |                   |                 |                                                 |                  |                      |
| 15                            | Pinellic acid          | 6.54            | 329.2343           | 353.2292 <sup>f</sup> | 330               | C18H34O5          | 4.327           | (-)329>311,229,>211>183,167                     | 226, 325         | REF[15]              |
| 16                            | 8,11-DiHODE            | 7.16            | 311.2228           | 313.2372              | 312               | C18H32O4          | 0.184           | (-)311>293>249,181>149                          | 222, 277         | REF[16]              |
| <i>Lysophospholipids</i>      |                        |                 |                    |                       |                   |                   |                 |                                                 |                  |                      |

|                      |                            |       |                       |                       |     |            |        |                                                  |                  |                                |
|----------------------|----------------------------|-------|-----------------------|-----------------------|-----|------------|--------|--------------------------------------------------|------------------|--------------------------------|
| 17                   | LysoPG 14:0                | 7.89  | 455.2431              | 457.2569              | 456 | C20H41O9P  | 3.355  | (-)455>227>209,153>97,79                         | 224, 279         | REF[17]                        |
| 18                   | LysoPC 14:0                | 8.01  | 512.3009 <sup>g</sup> | 468.3071              | 467 | C22H46O7NP | 3.139  | (-)512>452>227>209                               | 220              | REF[16]                        |
| 19                   | LysoPC 18:3                | 8.10  | 562.3167 <sup>g</sup> | 518.3230              | 517 | C26H48O7NP | 3.073  | (-)562>502>277>259,233,179                       | 222              | REF[18]                        |
| 20                   | LysoPE 18:2                | 8.46  | 476.2797              | 478.2920              | 477 | C23H44NO7P | 3.060  | (-)476>279>261>243                               | 230              | REF[18]                        |
| 21                   | LysoPC 18:2                | 8.51  | 564.3328 <sup>g</sup> | 520.3388              | 519 | C26H50O7NP | 3.913  | (-)564>504>279>261                               | 230              | REF[15]                        |
| 22                   | LysoPE 16:0                | 8.75  | 452.2799              | 454.2922              | 453 | C21H44O7NP | 3.510  | (-)452>255>237>183<br>(+)454>436>393>239,154     | 224              | REF[18]                        |
| 23                   | LysoPC 16:0                | 8.81  | 540.3320 <sup>g</sup> | 496.3379              | 495 | C24H50O7NP | 2.477  | (-)540>480>255>237<br>(+)496>478>419>283,163     | 224              | REF[15]                        |
| 24                   | LysoPE 18:1                | 8.96  | 478.2962              | 480.3079              | 479 | C23H46O7NP | 4.783  | (-)478>281>263>245                               | 225              | REF[17]                        |
| 25                   | LysoPC 18:1                | 9.04  | 566.3479 <sup>g</sup> | 544.3355 <sup>f</sup> | 521 | C26H52O7NP | 2.928  | (-)566>507>281>263                               | 225              | REF[15]                        |
| 26                   | LysoPE 18:0                | 9.58  | 480.3116              | 482.3232              | 481 | C23H48O7NP | 4.242  | (-)480>283>265>121,83                            | 226              | REF[15]                        |
| 27                   | LysoPC 18:0                | 9.71  | 568.3638 <sup>g</sup> | 524.3698              | 523 | C26H54O7NP | 3.234  | (-)568>508,479>283>265<br>(+)525>506,184>447>311 | 225              | REF[17]                        |
| <b>Hydroquinones</b> |                            |       |                       |                       |     |            |        |                                                  |                  |                                |
| 28                   | Auroglauclin               | 9.78  | 297.1501              | 299.1635              | 298 | C19H22O3   | 1.454  | (-)297>279,267,264,254,242,228>224>221,209       | 237, 279         | GNPS <sup>h</sup> ,<br>REF[19] |
| 29                   | Dihydroauroglauclin        | 9.71  | 299.1659              | 301.1789              | 300 | C19H24O3   | 1.979  | (-)299>281,271,218>203,189,174,162>135           | 228, 267,311     | GNPS,<br>REF[19]               |
| 30                   | Tetrahydroauroglau-<br>cin | 10.04 | 301.1812              | 303.1951              | 302 | C19H26O3   | 1.069  | (-)301>283,273,217>204,189>175,161               | 228, 249,<br>295 | GNPS                           |
| 31                   | Flavoglaucin               | 10.43 | 303.1970              | 305.2111              | 304 | C19H28O3   | 1.293  | (-)303>275,204>219>191,148,135                   | 226, 276         | GNPS,<br>REF[19]               |
| <b>Unknown</b>       |                            |       |                       |                       |     |            |        |                                                  |                  |                                |
| 32                   | N.I. (1)                   | 6.28  | 313.0357              | 315.0501              | 314 | C2H12O13N5 | -0.586 | (-)313>270>226>198,170                           | 223, 282         | -                              |
| 33                   | N.I. (2)                   | 7.85  | 415.1781              | 417.1901              | 416 | C10H26O9N9 | 0.069  | (-)415>397,309>294,264,252>236                   | 225, 325         | -                              |
| 34                   | N.I. (3)                   | 6.18  | 387.0728              | 389.0850              | 388 | C5H18O15N5 | 0.354  | (-)387>313,295>269>254,241,225                   | 222, 280         | -                              |
| 35                   | N.I. (4)                   | 8.24  | 331.1201              | 333.1328              | 332 | C19H16O2N4 | 0.154  | (-)331>287>259,243>215,187                       | 227              | -                              |
| 36                   | N.I. (5)                   | 8.50  | 388.2038              | 390.2172              | 389 | C10H29O8N8 | 0.623  | (-)388>319>235,207>190,166,139                   | 227              | -                              |

|    |           |      |          |                       |     |             |        |                                |          |   |
|----|-----------|------|----------|-----------------------|-----|-------------|--------|--------------------------------|----------|---|
| 37 | N.I. (6)  | 9.72 | 523.1408 | 547.3546 <sup>f</sup> | 524 | C17H26O14N5 | 0.863  | (-)523>254>226>198             | 226      | - |
| 38 | N.I. (7)  | 6.86 | 320.1409 | 322.1551              | 321 | C5H21O8N8   | -0.181 | (-)320>251>208,182,167>139     | 219      | - |
| 39 | N.I. (8)  | 5.81 | 401.0893 | 403.1022              | 402 | C21H14O5N4  | 0.392  | (-)401>358,327,309,283>281>253 | -        | - |
| 40 | N.I. (9)  | 6.51 | 322.1209 | 324.1708              | 323 | C20H19O4    | -0.488 | (-)322>294,253>225>210,154     | 214, 280 | - |
| 41 | N.I. (10) | 5.87 | 327.0523 | 329.0655              | 328 | C18H8O3N4   | 0.194  | (-)327>283>268,240>212,184     | 215      | - |
| 42 | N.I. (11) | 8.17 | 567.1310 | 569.1431              | 568 | C19H22O12N9 | -0.908 | (-)567>298>254>226             | 223, 274 | - |

<sup>a</sup> Tentative metabolites identified by comparing data with published literature and an in-house library

<sup>a</sup> Retention time (min)

<sup>b</sup> Molecular weight

<sup>c</sup> Mass

<sup>d</sup> Identifications

<sup>e</sup> Reference

<sup>f</sup> Adduct ion is sodium, [M+Na]<sup>+</sup>

<sup>g</sup> Adduct ion is formic acid, [M+COO]<sup>-</sup>

<sup>h</sup> Global natural products social molecular networking ; <https://gnps.ucsd.edu/ProteoSAFe/static/gnps-splash.jsp>

**Table S2.** List of significantly distinct metabolites from rice *koji* with different *Aspergillus* spp. during fermentation identified by GC-TOF-MS

| No.                                  | Ret(min) <sup>a</sup> | VIP <sup>b</sup> 1 | VIP2 | Metabolites <sup>c</sup> | Unique Mass <sup>d</sup> (m/z) | MS Fragment pattern(m/z)                        | TMS <sup>e</sup> | p-value | ID <sup>f</sup> |
|--------------------------------------|-----------------------|--------------------|------|--------------------------|--------------------------------|-------------------------------------------------|------------------|---------|-----------------|
| <i>Organic acid</i>                  |                       |                    |      |                          |                                |                                                 |                  |         |                 |
| 1                                    | 4.98                  | 1.59               | 1.19 | Lactic acid              | 117                            | 73,147,117,75,66,148,191,59,74,190,133,         | 2                | 0.00000 | Lib/STD         |
| 2                                    | 5.15                  | 1.40               | 0.98 | Acetic acid              | 177                            | 147,66,55,177,133,148,58,52,93,76               | 2                | 0.00000 | Lib/STD         |
| 3                                    | 7.00                  | 1.15               | 1.06 | Benzoic acid             | 179                            | 179,105,77,135,51,180,136,106,50,194,78,76,181, | 2                | 0.00000 | Lib/STD         |
| 4                                    | 13.55                 | 0.73               | 1.09 | Ferulic acid             | 338                            | 205,338,84,323,308,129,146,97                   | 2                | 0.00000 | Lib/STD         |
| <i>Sugar &amp; Sugar derivatives</i> |                       |                    |      |                          |                                |                                                 |                  |         |                 |
| 5                                    | 7.28                  | 1.12               | 1.07 | Glycerol                 | 151                            | 73,147,117,103,205,133,218,59,148,75,74,129,149 | 3                | 0.00000 | Lib/STD         |
| 6                                    | 9.34                  | 1.64               | 1.19 | Erythritol               | 217                            | 73,147,217,203,117,205,133,189,74,204           | 4                | 0.00000 | Lib/STD         |
| 7                                    | 9.41                  | 1.60               | 1.15 | meso-Erythritol          | 307                            | 147,73,103,217,117,189,205,191,129,13,116,148   | 4                | 0.00000 | Lib/STD         |
| 8                                    | 10.68                 | 0.80               | 1.16 | Xylose                   | 307                            | 73,103,217,147,74,307,133,189,59,75             | 4                | 0.00000 | Lib/STD         |
| 9                                    | 11.11                 | 1.45               | 1.03 | Adonitol                 | 319                            | 73,103,147,217,129,205,319,75,189,74            | 5                | 0.00000 | Lib/STD         |
| 10                                   | 12.09                 | 1.08               | 0.76 | Mannose                  | 319                            | 157,73,189,319,163,247,205,244,160              | 5                | 0.00000 | Lib/STD         |
| 11                                   | 12.45                 | 1.46               | 1.04 | Glucose                  | 217                            | 147,160,157,205,129,319,189                     | 5                | 0.00000 | Lib/STD         |
| 12                                   | 12.77                 | 1.38               | 0.97 | Gluconic acid            | 332                            | 147,73,129,189,157,59,131,149                   | 4                | 0.00000 | Lib/STD         |
| 13                                   | 13.66                 | 1.45               | 1.03 | Myo-inositol             | 305                            | 73,147,219,191,305,129,75,133,74                | 6                | 0.00000 | Lib/STD         |
| 14                                   | 14.84                 | 1.39               | 1.06 | Glyceryl-glycoside       | 204                            | 73,204,147,103,129,205,217,75,74,133,117,206    | 6                | 0.00000 | Lib/STD         |
| 15                                   | 16.72                 | 0.53               | 1.59 | Sucrose                  | 437                            | 73,147,217,361,103,169,129,75,74,362            | 8                | 0.00000 | Lib/STD         |
| 16                                   | 17.29                 | 0.47               | 1.59 | Maltose monohydrate      | 204                            | 73,204,75,217,129,147,103,74,117                | 8                | 0.00000 | Lib/STD         |
| <i>Fatty acid</i>                    |                       |                    |      |                          |                                |                                                 |                  |         |                 |
| 17                                   | 13.18                 | 1.60               | 1.12 | Palmitic acid            | 132                            | 117,75,73,129,132,145,55,131,313,57             | 1                | 0.00000 | Lib/STD         |
| 18                                   | 14.21                 | 1.41               | 0.99 | Linoleic acid            | 337                            | 75,73,67,81,55,79,129,95,117,82                 | 1                | 0.00000 | Lib/STD         |
| 19                                   | 14.23                 | 1.28               | 0.90 | Oleic acid               | 339                            | 75,73,117,129,55,145,67,96,81,84                | 1                | 0.00000 | Lib/STD         |
| 20                                   | 14.35                 | 1.35               | 0.95 | Stearic acid             | 341                            | 117,75,73,129,132,145,55,131,                   | 1                | 0.00000 | Lib/STD         |

<sup>a</sup> Retention time (min)

<sup>b</sup> variable importance projection (VIP)

<sup>c</sup> Tentative metabolites identified by mass spectrum consistent with those of standard compound, NIST, and in-house library and the different metabolites based on variable importance projection (VIP) analysis with a cutoff value of 1.0, and  $p < 0.05$ .

<sup>d</sup>  $m/z$  values are the selected ions for identification of derivatized metabolites

<sup>e</sup> Trimethylsilyl

<sup>f</sup> Identification: MS, mass fragment pattern; STD, standard compound

**Figure S2.** Correlation map of bioactivities (skin cell effect and antioxidant activity) and rice *koji* fermented with *Aspergillus cristatus* or *A. oryzae* metabolites according to Pearson's correlation coefficient. Each square indicates Pearson's correlation coefficient values (r). Red and blue represent positive ( $0 < r < 1$ ) and negative ( $-1 < r < 0$ ) correlation, respectively.

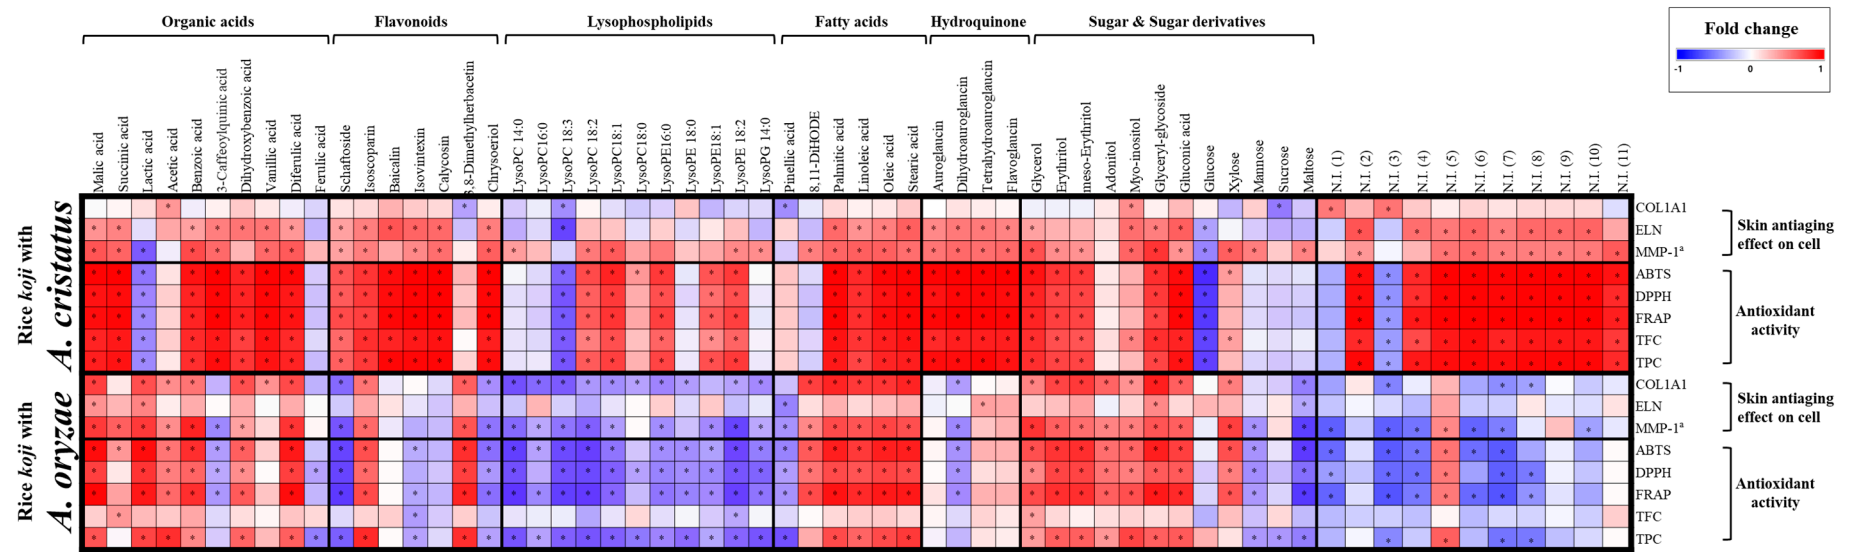

\*  $p < 0.05$

<sup>a</sup> Matrix metalloproteinase-1 (MMP-1); Negative correlation of MMP-1 was converted to positive correlation.

## Supplementary References

1. Fernández-Fernández, R.; López-Martínez, J.C.; Romero-González, R.; Martínez-Vidal, J.L.; Alarcón Flores, M.I.; Garrido Frenich, A. Simple LC–MS Determination of Citric and Malic Acids in Fruits and Vegetables. *Chromatographia* **2010**, *72*, 55–62, doi:10.1365/s10337-010-1611-0.
2. Pawlak, M.; Klupczynska, A.; Kokot, Z.J.; Matysiak, J. Extending Metabolomic Studies of Apis mellifera Venom: LC-MS-Based Targeted Analysis of Organic Acids. *Toxins (Basel)* **2019**, *12*, doi:10.3390/toxins12010014.
3. Prabakaran, M.; Chung, I.-M.; Son, N.-Y.; Chi, H.-Y.; Kim, S.-Y.; Yang, Y.-J.; Kwon, C.; An, Y.-J.; Ahmad, A.; Kim, S.-H. Analysis of selected phenolic compounds in organic, pesticide-free, conventional rice (*Oryza sativa* L.) using LC-ESI-MS/MS. *Molecules* **2019**, *24*, 67.
4. Seraglio, S.K.T.; Valese, A.C.; Daguer, H.; Bergamo, G.; Azevedo, M.S.; Gonzaga, L.V.; Fett, R.; Costa, A.C.O. Development and validation of a LC-ESI-MS/MS method for the determination of phenolic compounds in honeydew honeys with the diluted-and-shoot approach. *Food Res Int* **2016**, *87*, 60–67, doi:10.1016/j.foodres.2016.06.019.
5. Li, Y.; Tang, W.; Chen, J.; Jia, R.; Ma, L.; Wang, S.; Wang, J.; Shen, X.; Chu, Z.; Zhu, C.; et al. Development of Marker-Free Transgenic Potato Tubers Enriched in Caffeoylquinic Acids and Flavonols. *J Agric Food Chem* **2016**, *64*, 2932–2940, doi:10.1021/acs.jafc.6b00270.
6. Kowalska, I.; Jedrejek, D.; Jonczyk, K.; Stochmal, A. UPLC–PDA–ESI–MS analysis and TLC–DPPH· activity of wheat varieties. *Acta Chromatographica* **2019**, *31*, 151–156.
7. Verardo, V.; Gómez-Caravaca, A.M.; Marconi, E.; Segura-Carretero, A.; Garrido-Frenich, A.; Fernández-Gutiérrez, A. Determination of lipophilic and hydrophilic bioactive compounds in raw and parboiled rice bran. *RSC advances* **2016**, *6*, 50786–50796.
8. Chiremba, C.; Taylor, J.R.N.; Rooney, L.W.; Beta, T. Phenolic acid content of sorghum and maize cultivars varying in hardness. *Food Chemistry* **2012**, *134*, 81–88, doi:https://doi.org/10.1016/j.foodchem.2012.02.067.
9. Colombo, R.; Yariwake, J.H.; McCullagh, M. Study of C-and O-glycosylflavones in sugarcane extracts using liquid chromatography: Exact mass measurement mass spectrometry. *Journal of the Brazilian Chemical Society* **2008**, *19*, 483–490.
10. Kim, B.; Woo, S.; Kim, M.-J.; Kwon, S.-W.; Lee, J.; Sung, S.H.; Koh, H.-J. Identification and quantification of flavonoids in yellow grain mutant of rice (*Oryza sativa* L.). *Food chemistry* **2018**, *241*, 154–162.
11. Fong, S.Y.K.; Wong, Y.C.; Zuo, Z. Development of a SPE-LC/MS/MS method for simultaneous quantification of baicalein, wogonin, oroxylin A and their glucuronides baicalin, wogonoside and oroxyloside in rats and its application to brain uptake and plasma pharmacokinetic studies. *Journal of pharmaceutical and biomedical analysis* **2014**, *97*, 9–23.
12. Galland, M.; Boutet-Mercey, S.; Lounifi, I.; Godin, B.; Balzergue, S.; Grandjean, O.; Morin, H.; Perreau, F.; Debeaujon, I.; Rajjou, L. Compartmentation and dynamics of flavone metabolism in dry and germinated rice seeds. *Plant and Cell Physiology* **2014**, *55*, 1646–1659.
13. Kong, C.; Xu, X.; Zhou, B.; Hu, F.; Zhang, C.; Zhang, M. Two compounds from allelopathic rice accession and their inhibitory activity on weeds and fungal pathogens. *Phytochemistry* **2004**, *65*, 1123–1128.
14. Kim, A.J.; Choi, J.N.; Kim, J.; Yeo, S.H.; Choi, J.H.; Lee, C.H. Metabolomics-based optimal koji fermentation for tyrosinase inhibition supplemented with Astragalus Radix. *Bioscience, biotechnology, and biochemistry* **2012**, 110171.
15. Kim, G.R.; Jung, E.S.; Lee, S.; Lim, S.-H.; Ha, S.-H.; Lee, C.H. Combined mass spectrometry-based metabolite profiling of different pigmented rice (*Oryza sativa* L.) seeds and correlation with antioxidant activities. *Molecules* **2014**, *19*, 15673–15686.
16. Son, S.Y.; Lee, S.; Singh, D.; Lee, N.-R.; Lee, D.-Y.; Lee, C.H. Comprehensive secondary metabolite profiling toward delineating the solid and submerged-state fermentation of *Aspergillus oryzae* KCCM 12698. *Frontiers in microbiology* **2018**, *9*, 1076.
17. Lim, D.K.; Mo, C.; Long, N.P.; Kim, G.; Kwon, S.W. Simultaneous profiling of lysoglycerophospholipids in rice (*Oryza sativa* L.) using direct infusion-tandem mass spectrometry with multiple reaction monitoring. *Journal of agricultural and food chemistry* **2017**, *65*, 2628–2634.
18. Lee, D.E.; Lee, S.; Jang, E.S.; Shin, H.W.; Moon, B.S.; Lee, C.H. Metabolomic profiles of *Aspergillus oryzae* and *Bacillus amyloliquefaciens* during rice koji fermentation. *Molecules* **2016**, *21*, 773.
19. Nies, J.; Ran, H.; Wohlgemuth, V.; Yin, W.-B.; Li, S.-M. Biosynthesis of the prenylated salicylaldehyde flavoglucan requires temporary reduction to salicyl alcohol for decoration before reoxidation to the final product. *Organic letters* **2020**, *22*, 2256–2260.
